# Supplementary material for: SIRT1 promotes formation of breast cancer through modulating Akt activity
Source: PubMed Central journal article supplement — J Cancer. 2018 Apr 30;9(11):2012–23. doi: 10.7150/jca.24275 (PMC5995935; doi:10.7150/jca.24275), 2018-04-30
Supplement: jcav09p2012s1.pdf [file jcav09p2012s1.pdf]

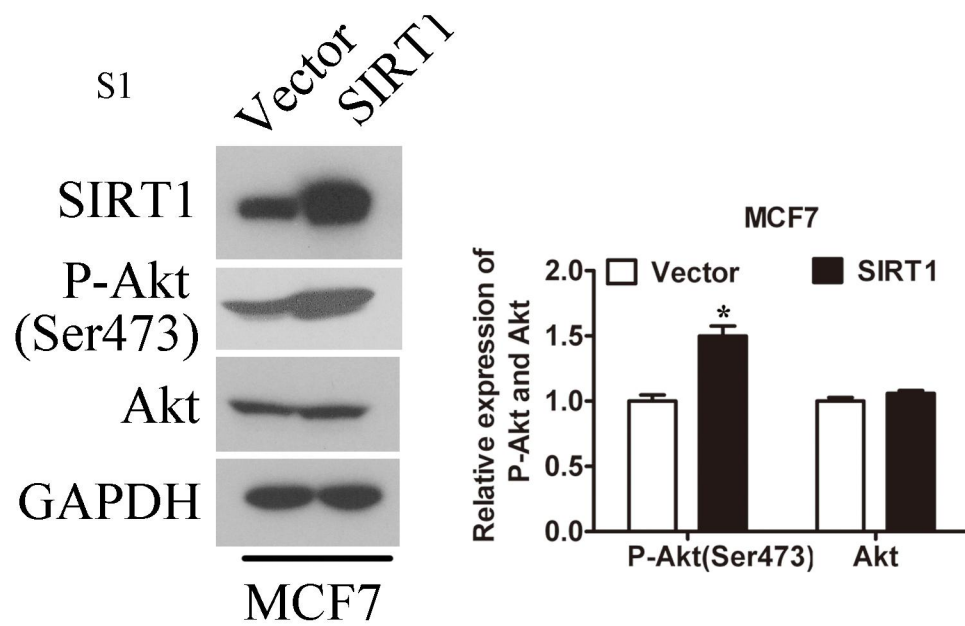

**Figure S1.** Western blot analysis of P-Akt and Akt expression between MCF-7-SIRT1 and MCF-7-Vector breast cancer cells (Data were presented as means $\pm$  SEM. \*\* $p$ <0.01. Student's t-test).

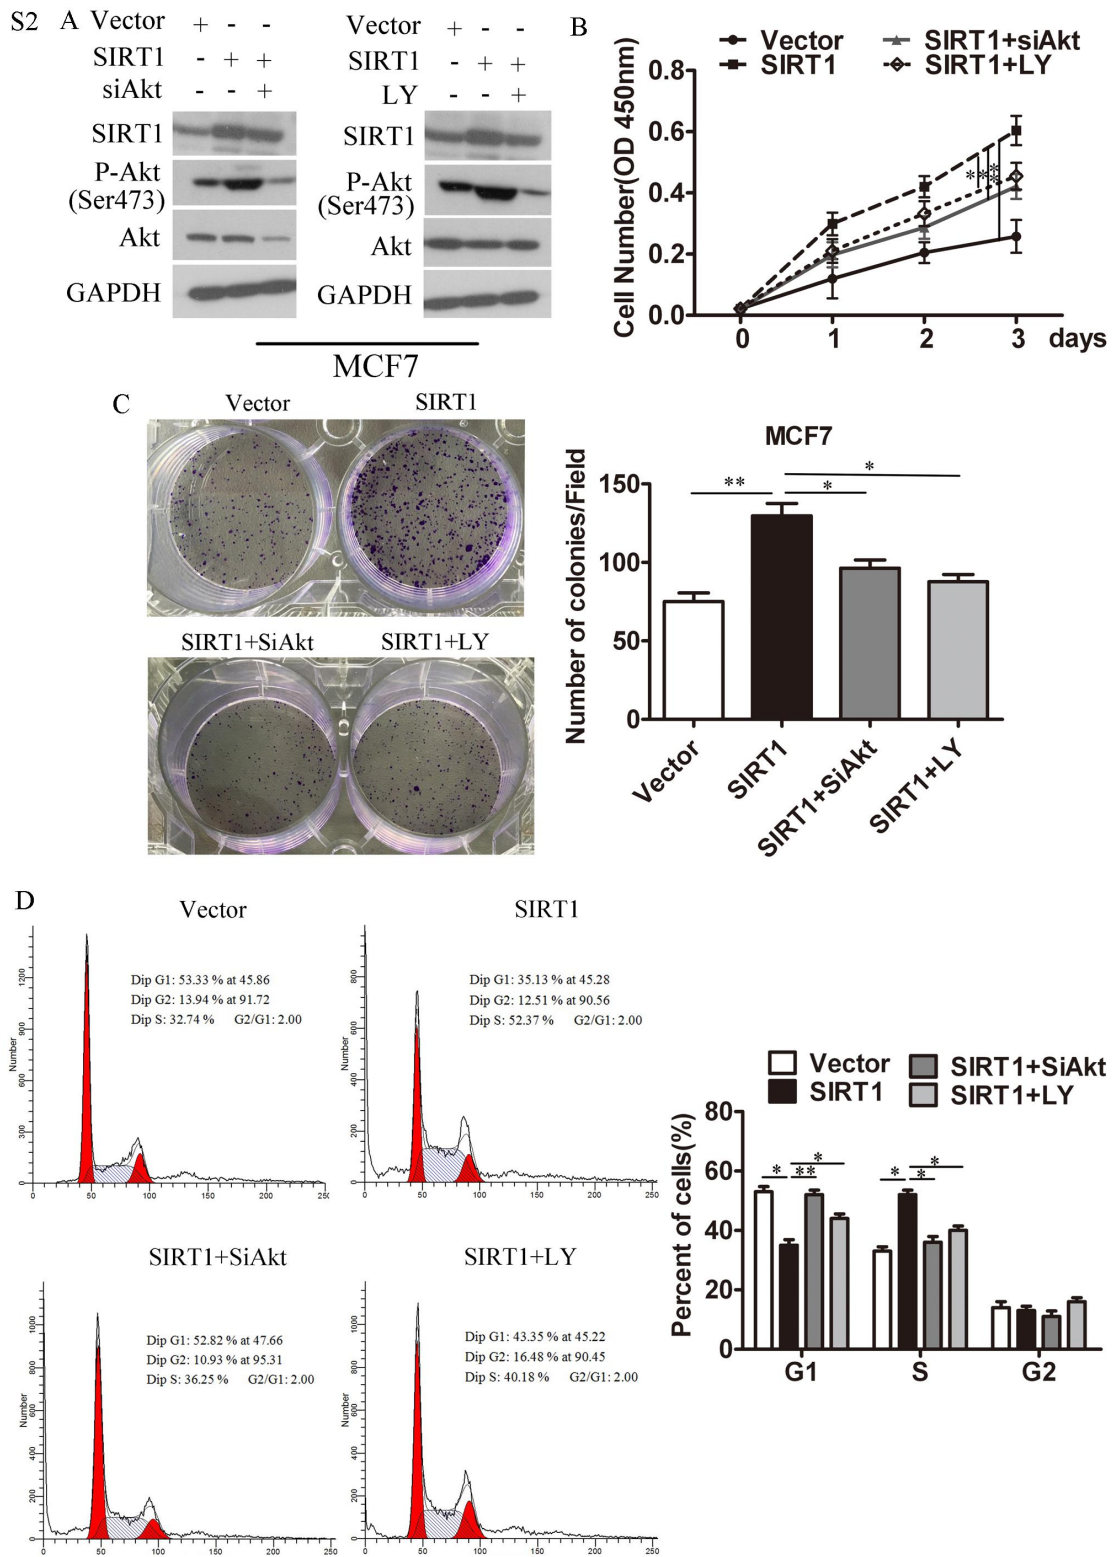

**Figure S2.** (A) Depletion of P-Akt and Akt in MCF-7-SIRT1 cells with siAkt and LY294002. Protein levels of SIRT1, P-Akt and Akt were detected by Western blot analysis. (B) Cell viability analysis (C) Colony

formation (D) Cell cycle distribution were evaluated (Data were presented as means±SEM. \* $p < 0.05$ , \*\* $p < 0.01$ . Student's t-test. Cell viability analysis with  $n=6$ ; the rest analyzed with  $n=3$ ).

S3

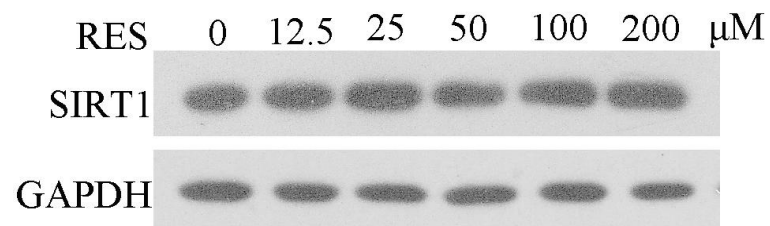

**Figure S3.** Protein level of SIRT1 was detected in RES-treated MDA-MB-231 cells.
